# Supplementary material for: Urbanization Increases Pathogen Pressure on Feral and Managed Honey Bees
Source: PLoS One. 2015 Nov 4;10(11):e0142031. doi: 10.1371/journal.pone.0142031 (PMC4633120; doi:10.1371/journal.pone.0142031)
Supplement: S1 Data — (XLSX) [file pone.0142031.s001.xlsx]

## Sheet: data
ColonyID	Manage	Date	aIMP100m	aIMP300m	aIMP500m	aIMP1000m	aIMP1500m	aIMP2000m	aIMP3000m	ABCIN	DEF	HYM	PROPO	NAPIS	NCER	ABPV	BQCV	CBPV	DWV	IAPV	KBV	SBV
RFN011	feral	164	0.403789	0.574772	0.597143	0.5162	0.435594	0.389373	0.316284	2541.67	2769.62	3983.39	4.40867	153.624	1631.74	9.87172	658.482	0	49.887	0	0	0
RFN021	feral	165	0.811124	0.410686	0.412311	0.373431	0.453047	0.424842	0.329785	972.72	5335.37	6782.76	2.36617	0	218.368	97.0739	152.803	37.9081	1.25585e+06	0	0	0
RFN041	feral	179	0.0698053	0.0542764	0.114927	0.146067	0.242005	0.244512	0.260322	1548.49	2138.31	2552.47	1.64204	0	943.844	4378.74	0	0	1.3891e+07	0	0	11.1075
RFN051	feral	197	0.342154	0.527945	0.476146	0.385438	0.305386	0.253074	0.184394	2895.07	3081.48	5837.74	3.10847	2358.9	229396	0	1261.4	0	187745	0	0	0
RFN061	feral	202	0.0453898	0.175203	0.255902	0.339683	0.300622	0.255219	0.223676	4226.95	3130.28	3848.24	2.21392	0	2514.58	10.4894	138.263	1.28197	2.72832e+06	1149.72	0	23529.7
RFN071	feral	210	0.0338126	0.212335	0.265103	0.257704	0.272679	0.292273	0.308459	877.606	4003.92	5225.24	3.03378	0	274.748	0	69.7289	0	0	0	0	0
RFN081	feral	220	0	0.229988	0.25549	0.233329	0.212039	0.17897	0.161992	3071.29	3227.09	6962.14	3.49182	145.373	11367.6	533564	150386	1	2.44186e+06	0	149.028	99.8597
RFN091	feral	232	0.257523	0.296617	0.224304	0.144453	0.126656	0.172353	0.218517	974.488	7503.74	15060.2	3.78865	0	484.808	288.191	0	6.81149	21.0551	0	0	0
RFN101	feral	236	0.225513	0.158474	0.124276	0.162763	0.172392	0.165246	0.164867	2030.05	3347.15	3181.52	3.22799	1935.53	3.67622e+08	29.5342	0	0	4.20083e+07	0	32.2872	0
RMB011	managed	179	0.0717753	0.0543626	0.1138	0.144737	0.240947	0.243361	0.25997	1880.88	3678.31	2793.16	3.0822	0	480.076	173.625	440.602	0	3.20714e+07	0	27.8653	112.224
RMB021	managed	183	0.133863	0.116891	0.167732	0.167334	0.166096	0.153983	0.152797	682.573	936.326	1398.11	9.3627	1030.51	202194351	367.941	180497	16.4566	331916	1.78512e+07	0	0
RMB031	managed	184	0.133863	0.116702	0.167956	0.167387	0.16604	0.154005	0.152786	2243.82	2691.44	2035.33	4.16846	70.4051	130233	3777.32	6256.06	10.9419	597985	6285.3	0	6.85163
RMB041	managed	189	0	0.0599504	0.0513865	0.0416072	0.0376606	0.0635486	0.0589695	1787.58	3042.53	4156.89	1.94818	0	84.6071	0	8097.85	2.60171	2.3969e+07	0	0	8.37288
RMB051	managed	188	0	0.0599504	0.0513865	0.0416072	0.0376606	0.0635486	0.0589695	1181.1	2655.6	3528.6	2.49778	0	466.674	95.3616	34066.7	0	569907	0	7.33469	4889.24
RMB081	managed	247	0.153054	0.137537	0.108648	0.0897904	0.0707833	0.0818228	0.0783259	593.437	1497	1188.87	3.16734	0	8.62658e+07	253.275	152.015	59.387	50.3604	0	3.50124	0
SFN011	feral	211	0.310648	0.291013	0.321808	0.360405	0.406318	0.39147	0.354356	2329.28	8029.5	10923.5	3.59615	0	1305.35	455.195	137.699	0	1.0259e+06	0	245.187	0
SFN021	feral	223	0.334554	0.51452	0.610152	0.57241	0.519351	0.492775	0.411448	505.774	1489	2061.97	4.09336	0	4.58131e+08	0	169.696	4.22654	234.751	0	9.17927	7770.04
SMB012	managed	203	0.276047	0.230463	0.370928	0.484643	0.489633	0.457863	0.47593	171.639	572.94	1384.1	4.28655	737.018	3.61764e+08	0	1608.27	13.0894	4.37131e+06	0	0	2044.35
SMB021	managed	174	0.511303	0.55577	0.527435	0.53476	0.562116	0.537701	0.51959	2188.42	2526.28	5260.7	2.29647	1256.34	4.44504e+08	158.512	163590	0	2.00097e+06	0	0	575611
SMB051	managed	198	0.793732	0.661	0.600308	0.532523	0.512917	0.506541	0.465276	429.325	1159.2	1262.43	3.76495	414.889	2.0305e+08	108.15	60760.8	1.93626	137.18	0	0	0
SMB061	managed	235	0.442831	0.483315	0.522685	0.415604	0.382317	0.39232	0.372799	1236.43	2991.97	4636.37	2.14632	491.375	3.82443e+08	16.2339	149.208	0	1.42628e+06	0	0	0
SMB071	managed	235	0.442831	0.483315	0.522685	0.415604	0.382317	0.39232	0.372799	247.3	842.914	1757.71	5.5209	3705.76	587485	0	0	0	270.111	0	0	0
UFN011	feral	184	1.00407	0.991262	0.976002	0.899935	0.767008	0.680034	0.594235	1381.77	4515.05	7017.02	3.8616	0	1.10665e+07	0	47804.3	0	1.94124e+07	0	0	0
UFN021	feral	191	0.42374	0.45196	0.454249	0.377649	0.366756	0.378211	0.45793	1922.34	3679.6	3764.73	1.65695	503.931	1.61847e+08	50.1527	9346.51	0	701598	45.7267	0	6.00846
UFN031	feral	221	0.385095	0.425761	0.448253	0.528025	0.615563	0.625575	0.588629	1512.32	3948.04	3514.29	1.43465	0	3402.25	0	3.75672e+06	0	954761	0	0	0
UFN041	feral	234	0.479994	0.524618	0.597092	0.662752	0.658057	0.640252	0.602078	1165.92	2931.04	3261.43	5.13063	0	968.15	36.3332	104513	0	563112	0	0	67961.2
UMB011	managed	177	0.406427	0.48717	0.484834	0.511916	0.512196	0.529455	0.534094	2176.67	4093.52	4497.14	3.08788	1413.03	152511	0	0	0	0	0	0	0
UMB021	managed	178	0.521351	0.597307	0.594857	0.513404	0.478497	0.452255	0.438443	642.944	2667.72	3534.64	3.05836	0	185.452	3.67851	69169.2	6.30642	0	0	0	229120
UMB031	managed	178	0.532574	0.601299	0.596583	0.513595	0.478316	0.452071	0.438615	390.418	2367.12	2073.24	4.67807	510.139	822166	8671.52	10634.4	0	133.775	0	0	25414.4
UMB041	managed	203	0.531263	0.64667	0.650773	0.643522	0.610577	0.555898	0.540292	1639.3	6662.79	10191.9	2.62625	356.115	7.57017e+07	0	198295	0	9.4922e+06	0	0	0
UMB052	managed	201	0.573143	0.642512	0.654792	0.644913	0.611159	0.555923	0.54037	696.19	947.327	2041.82	1.94791	1155.2	5.65113e+08	9735.82	2385.29	5.14613	1600.77	0	11.7793	0
UMB061	managed	204	0.894598	0.72275	0.669118	0.604332	0.594168	0.564046	0.516816	835.063	2591.72	3553.43	2.2506	705.389	3.35414e+08	0	9420.8	0	4475.81	0	0	16481.5
UMB071	managed	204	0.894598	0.72275	0.669118	0.604332	0.594168	0.564046	0.516816	508.901	519.141	753.457	10.597	0	4827.08	372.755	10652.5	0	101.254	1.33953	0	62475.6
UMB081	managed	207	0.385095	0.425761	0.448253	0.528025	0.615563	0.625575	0.588629	353.79	2288.19	4943.6	1.17485	328.515	3.50787e+08	41969.7	75915.6	20.662	8.88371e+06	0	0	26.0412
UMB091	managed	207	0.385095	0.425761	0.448253	0.528025	0.615563	0.625575	0.588629	82.926	613.136	1504.21	1	2215.6	1624812089	0	22743.8	0	1.40882e+07	0	0	48756.4

## Sheet: info
Column header from data sheet	Explanation
ColonyID	Unique ID for each colony (also used in S10 and S11)
Manage	Colonies were feral or managed (by beekeepers)
Date	Julian date that worker bees were sampled from the colony
aIMP100m	arcsin-transformed proportion of impervious surface within a 100 m radius of each colony
aIMP300m	as above, 300 m radius
aIMP500m	as above, 500 m radius
aIMP1000m	as above, 1000 m radius
aIMP1500m	as above, 1500 m radius
aIMP2000m	as above, 2000 m radius
aIMP3000m	as above, 3000 m radius
ABCIN	Abaecin gene expression, expressed as 2^-ddCt, normalized to beta-actin and to rarest detected immune transcript
DEF	As above for defensin
HYM	As above for hymenoptaecin
PROPO	As above for prophenoloxidase
NAPIS	Nosema apis gene expression, expressed as 2^-ddCt, normalized to beta-actin and to rarest detected disease transcript
NCER	As above for Nosema ceranae
ABPV	As above for Acute bee paralysis virus
BQCV	As above for Black queen cell virus
CBPV	As above for Chronic bee paralysis virus
DWV	As above for Deformed wing virus
IAPV	As above for Israeli acute paralysis virus
KBV	As above for Kashmiri bee virus
SBV	As above for Sac brood virus
