# Supplementary material for: Urbanization Increases Pathogen Pressure on Feral and Managed Honey Bees
Source: PLoS One. 2015 Nov 4;10(11):e0142031. doi: 10.1371/journal.pone.0142031 (PMC4633120; doi:10.1371/journal.pone.0142031)
Supplement: S3 Data — (XLSX) [file pone.0142031.s003.xlsx]

## Sheet: Survival
Colony	Management	Treatment	Left	Right	Censor
RMB041	keeper	Par	0	12	1
RMB041	keeper	Par	0	12	1
RMB041	keeper	Par	12	24	1
RMB041	keeper	Par	24	36	1
RMB041	keeper	Par	24	36	1
RMB041	keeper	Par	24	36	1
RMB041	keeper	Par	24	36	1
RMB041	keeper	Par	36	48	1
RMB041	keeper	Par	48	60	1
RMB041	keeper	Par	48	60	1
RMB041	keeper	Par	60	72	1
RMB041	keeper	Par	60	72	1
RMB041	keeper	Par	60	72	1
RMB041	keeper	Par	72	84	1
RMB041	keeper	Par	72	84	1
RMB041	keeper	Par	72	84	1
RMB041	keeper	Par	72	84	1
RMB041	keeper	Par	72	84	1
RMB041	keeper	Par	72	84	1
RMB041	keeper	Par	84	96	1
RMB041	keeper	Par	84	96	1
RMB041	keeper	Par	96	96	0
RMB041	keeper	Ctl	60	72	1
RMB041	keeper	Ctl	60	72	1
RMB041	keeper	Ctl	96	96	0
RMB041	keeper	Ctl	96	96	0
RMB041	keeper	Ctl	96	96	0
RMB041	keeper	Ctl	96	96	0
RMB041	keeper	Ctl	96	96	0
RMB041	keeper	Ctl	96	96	0
RMB041	keeper	Ctl	96	96	0
RMB041	keeper	Ctl	96	96	0
RMB041	keeper	Ctl	96	96	0
RMB051	keeper	Par	0	12	1
RMB051	keeper	Par	0	12	1
RMB051	keeper	Par	0	12	1
RMB051	keeper	Par	0	12	1
RMB051	keeper	Par	12	24	1
RMB051	keeper	Par	12	24	1
RMB051	keeper	Par	12	24	1
RMB051	keeper	Par	24	36	1
RMB051	keeper	Par	24	36	1
RMB051	keeper	Par	24	36	1
RMB051	keeper	Par	24	36	1
RMB051	keeper	Par	24	36	1
RMB051	keeper	Par	24	36	1
RMB051	keeper	Par	24	36	1
RMB051	keeper	Par	24	36	1
RMB051	keeper	Par	24	36	1
RMB051	keeper	Par	24	36	1
RMB051	keeper	Par	36	48	1
RMB051	keeper	Par	36	48	1
RMB051	keeper	Par	60	72	1
RMB051	keeper	Par	72	84	1
RMB051	keeper	Par	96	96	0
RMB051	keeper	Ctl	24	36	1
RMB051	keeper	Ctl	96	96	0
RMB051	keeper	Ctl	96	96	0
RMB051	keeper	Ctl	96	96	0
RMB051	keeper	Ctl	96	96	0
RMB051	keeper	Ctl	96	96	0
RMB051	keeper	Ctl	96	96	0
RMB051	keeper	Ctl	96	96	0
RMB051	keeper	Ctl	96	96	0
RMB051	keeper	Ctl	96	96	0
RMB051	keeper	Ctl	96	96	0
RMB081	keeper	Par	12	24	1
RMB081	keeper	Par	12	24	1
RMB081	keeper	Par	36	48	1
RMB081	keeper	Par	36	48	1
RMB081	keeper	Par	36	48	1
RMB081	keeper	Par	36	48	1
RMB081	keeper	Par	36	48	1
RMB081	keeper	Par	48	60	1
RMB081	keeper	Par	48	60	1
RMB081	keeper	Par	48	60	1
RMB081	keeper	Par	60	72	1
RMB081	keeper	Par	60	72	1
RMB081	keeper	Par	60	72	1
RMB081	keeper	Par	60	72	1
RMB081	keeper	Par	60	72	1
RMB081	keeper	Par	60	72	1
RMB081	keeper	Par	60	72	1
RMB081	keeper	Par	96	96	0
RMB081	keeper	Par	96	96	0
RMB081	keeper	Par	96	96	0
RMB081	keeper	Par	96	96	0
RMB081	keeper	Ctl	96	96	0
RMB081	keeper	Ctl	96	96	0
RMB081	keeper	Ctl	96	96	0
RMB081	keeper	Ctl	96	96	0
RMB081	keeper	Ctl	96	96	0
RMB081	keeper	Ctl	96	96	0
RMB081	keeper	Ctl	96	96	0
RMB081	keeper	Ctl	96	96	0
RMB081	keeper	Ctl	96	96	0
RMB071	keeper	Par	0	12	1
RMB071	keeper	Par	0	12	1
RMB071	keeper	Par	12	24	1
RMB071	keeper	Par	12	24	1
RMB071	keeper	Par	12	24	1
RMB071	keeper	Par	24	36	1
RMB071	keeper	Par	24	36	1
RMB071	keeper	Par	36	48	1
RMB071	keeper	Par	36	48	1
RMB071	keeper	Par	36	48	1
RMB071	keeper	Par	36	48	1
RMB071	keeper	Par	36	48	1
RMB071	keeper	Par	48	60	1
RMB071	keeper	Par	48	60	1
RMB071	keeper	Par	48	60	1
RMB071	keeper	Par	48	60	1
RMB071	keeper	Par	60	72	1
RMB071	keeper	Par	60	72	1
RMB071	keeper	Par	60	72	1
RMB071	keeper	Par	96	96	0
RMB071	keeper	Par	96	96	0
RMB071	keeper	Ctl	0	12	1
RMB071	keeper	Ctl	24	36	1
RMB071	keeper	Ctl	48	60	1
RMB071	keeper	Ctl	48	60	1
RMB071	keeper	Ctl	48	60	1
RMB071	keeper	Ctl	72	84	1
RMB071	keeper	Ctl	96	96	0
RMB071	keeper	Ctl	96	96	0
RMB071	keeper	Ctl	96	96	0
RMB071	keeper	Ctl	96	96	0
RFN091	Feral	Par	0	12	1
RFN091	Feral	Par	0	12	1
RFN091	Feral	Par	0	12	1
RFN091	Feral	Par	0	12	1
RFN091	Feral	Par	0	12	1
RFN091	Feral	Par	0	12	1
RFN091	Feral	Par	0	12	1
RFN091	Feral	Par	0	12	1
RFN091	Feral	Par	12	24	1
RFN091	Feral	Par	12	24	1
RFN091	Feral	Par	12	24	1
RFN091	Feral	Par	12	24	1
RFN091	Feral	Par	12	24	1
RFN091	Feral	Par	12	24	1
RFN091	Feral	Par	12	24	1
RFN091	Feral	Par	12	24	1
RFN091	Feral	Par	12	24	1
RFN091	Feral	Par	36	48	1
RFN091	Feral	Par	36	48	1
RFN091	Feral	Par	36	48	1
RFN091	Feral	Par	36	48	1
RFN091	Feral	Par	48	60	1
RFN091	Feral	Par	60	72	1
RFN091	Feral	Par	72	84	1
RFN091	Feral	Par	72	84	1
RFN091	Feral	Par	96	96	0
RFN091	Feral	Ctl	0	12	1
RFN091	Feral	Ctl	0	12	1
RFN091	Feral	Ctl	0	12	1
RFN091	Feral	Ctl	12	24	1
RFN091	Feral	Ctl	12	24	1
RFN091	Feral	Ctl	73	85	1
RFN091	Feral	Ctl	96	96	0
RFN091	Feral	Ctl	96	96	0
RFN091	Feral	Ctl	96	96	0
RFN091	Feral	Ctl	96	96	0
RFN091	Feral	Ctl	96	96	0
RFN091	Feral	Ctl	96	96	0
RMB031	keeper	Par	0	12	1
RMB031	keeper	Par	0	12	1
RMB031	keeper	Par	12	24	1
RMB031	keeper	Par	12	24	1
RMB031	keeper	Par	12	24	1
RMB031	keeper	Par	24	36	1
RMB031	keeper	Par	24	36	1
RMB031	keeper	Par	24	36	1
RMB031	keeper	Par	24	36	1
RMB031	keeper	Par	24	36	1
RMB031	keeper	Par	24	36	1
RMB031	keeper	Par	24	36	1
RMB031	keeper	Par	24	36	1
RMB031	keeper	Par	36	48	1
RMB031	keeper	Par	36	48	1
RMB031	keeper	Par	48	60	1
RMB031	keeper	Par	48	60	1
RMB031	keeper	Par	60	72	1
RMB031	keeper	Par	84	96	1
RMB031	keeper	Par	96	96	0
RMB031	keeper	Par	96	96	0
RMB031	keeper	Par	96	96	0
RMB031	keeper	Ctl	48	60	1
RMB031	keeper	Ctl	84	96	1
RMB031	keeper	Ctl	96	96	0
RMB031	keeper	Ctl	96	96	0
RMB031	keeper	Ctl	96	96	0
RMB031	keeper	Ctl	96	96	0
RMB031	keeper	Ctl	96	96	0
RMB031	keeper	Ctl	96	96	0
RMB031	keeper	Ctl	96	96	0
RMB031	keeper	Ctl	96	96	0
RMB031	keeper	Ctl	96	96	0
RMB021	keeper	Par	0	12	1
RMB021	keeper	Par	0	12	1
RMB021	keeper	Par	0	12	1
RMB021	keeper	Par	0	12	1
RMB021	keeper	Par	12	24	1
RMB021	keeper	Par	12	24	1
RMB021	keeper	Par	12	24	1
RMB021	keeper	Par	24	36	1
RMB021	keeper	Par	36	48	1
RMB021	keeper	Par	36	48	1
RMB021	keeper	Par	36	48	1
RMB021	keeper	Par	36	48	1
RMB021	keeper	Par	36	48	1
RMB021	keeper	Par	36	48	1
RMB021	keeper	Par	48	60	1
RMB021	keeper	Par	60	72	1
RMB021	keeper	Par	60	72	1
RMB021	keeper	Par	60	72	1
RMB021	keeper	Par	84	96	1
RMB021	keeper	Par	96	96	0
RMB021	keeper	Par	96	96	0
RMB021	keeper	Ctl	96	96	0
RMB021	keeper	Ctl	96	96	0
RMB021	keeper	Ctl	96	96	0
RMB021	keeper	Ctl	96	96	0
RMB021	keeper	Ctl	96	96	0
RMB021	keeper	Ctl	96	96	0
RMB021	keeper	Ctl	96	96	0
RMB021	keeper	Ctl	96	96	0
RMB021	keeper	Ctl	96	96	0
RMB021	keeper	Ctl	96	96	0
RMB061	keeper	Par	0	12	1
RMB061	keeper	Par	0	12	1
RMB061	keeper	Par	12	24	1
RMB061	keeper	Par	12	24	1
RMB061	keeper	Par	24	36	1
RMB061	keeper	Par	24	36	1
RMB061	keeper	Par	24	36	1
RMB061	keeper	Par	24	36	1
RMB061	keeper	Par	24	36	1
RMB061	keeper	Par	24	36	1
RMB061	keeper	Par	24	36	1
RMB061	keeper	Par	24	36	1
RMB061	keeper	Par	24	36	1
RMB061	keeper	Par	24	36	1
RMB061	keeper	Par	24	36	1
RMB061	keeper	Par	24	36	1
RMB061	keeper	Par	36	48	1
RMB061	keeper	Par	36	48	1
RMB061	keeper	Par	36	48	1
RMB061	keeper	Par	36	48	1
RMB061	keeper	Par	60	72	1
RMB061	keeper	Ctl	0	12	1
RMB061	keeper	Ctl	12	24	1
RMB061	keeper	Ctl	72	84	1
RMB061	keeper	Ctl	96	96	0
RMB061	keeper	Ctl	96	96	0
RMB061	keeper	Ctl	96	96	0
RMB061	keeper	Ctl	96	96	0
RMB061	keeper	Ctl	96	96	0
RMB061	keeper	Ctl	96	96	0
RMB061	keeper	Ctl	96	96	0
RMB061	keeper	Ctl	96	96	0
RFN101	Feral	Par	0	12	1
RFN101	Feral	Par	0	12	1
RFN101	Feral	Par	12	24	1
RFN101	Feral	Par	12	24	1
RFN101	Feral	Par	12	24	1
RFN101	Feral	Par	12	24	1
RFN101	Feral	Par	12	24	1
RFN101	Feral	Par	12	24	1
RFN101	Feral	Par	12	24	1
RFN101	Feral	Par	12	24	1
RFN101	Feral	Par	12	24	1
RFN101	Feral	Par	12	24	1
RFN101	Feral	Par	24	36	1
RFN101	Feral	Par	24	36	1
RFN101	Feral	Par	36	48	1
RFN101	Feral	Par	36	48	1
RFN101	Feral	Par	36	48	1
RFN101	Feral	Par	36	48	1
RFN101	Feral	Par	36	48	1
RFN101	Feral	Par	36	48	1
RFN101	Feral	Par	36	48	1
RFN101	Feral	Par	36	48	1
RFN101	Feral	Par	36	48	1
RFN101	Feral	Par	36	48	1
RFN101	Feral	Par	84	96	1
RFN101	Feral	Par	96	96	0
RFN101	Feral	Ctl	0	12	1
RFN101	Feral	Ctl	96	96	0
RFN101	Feral	Ctl	96	96	0
RFN101	Feral	Ctl	96	96	0
RFN101	Feral	Ctl	96	96	0
RFN101	Feral	Ctl	96	96	0
RFN101	Feral	Ctl	96	96	0
RFN101	Feral	Ctl	96	96	0
RFN101	Feral	Ctl	96	96	0
RFN101	Feral	Ctl	96	96	0
RFN101	Feral	Ctl	96	96	0
RFN101	Feral	Ctl	96	96	0
RFN101	Feral	Ctl	96	96	0
RFN081	Feral	Par	12	24	1
RFN081	Feral	Par	12	24	1
RFN081	Feral	Par	12	24	1
RFN081	Feral	Par	12	24	1
RFN081	Feral	Par	12	24	1
RFN081	Feral	Par	12	24	1
RFN081	Feral	Par	24	36	1
RFN081	Feral	Par	24	36	1
RFN081	Feral	Par	24	36	1
RFN081	Feral	Par	24	36	1
RFN081	Feral	Par	36	48	1
RFN081	Feral	Par	36	48	1
RFN081	Feral	Par	36	48	1
RFN081	Feral	Par	36	48	1
RFN081	Feral	Par	36	48	1
RFN081	Feral	Par	36	48	1
RFN081	Feral	Par	36	48	1
RFN081	Feral	Par	36	48	1
RFN081	Feral	Par	36	48	1
RFN081	Feral	Par	96	96	0
RFN081	Feral	Ctl	60	72	1
RFN081	Feral	Ctl	84	96	1
RFN081	Feral	Ctl	96	96	0
RFN081	Feral	Ctl	96	96	0
RFN081	Feral	Ctl	96	96	0
RFN081	Feral	Ctl	96	96	0
RFN081	Feral	Ctl	96	96	0
RFN081	Feral	Ctl	96	96	0
RFN081	Feral	Ctl	96	96	0
RFN081	Feral	Ctl	96	96	0
RMB011	keeper	Par	0	12	1
RMB011	keeper	Par	0	12	1
RMB011	keeper	Par	0	12	1
RMB011	keeper	Par	0	12	1
RMB011	keeper	Par	12	24	1
RMB011	keeper	Par	24	36	1
RMB011	keeper	Par	24	36	1
RMB011	keeper	Par	24	36	1
RMB011	keeper	Par	24	36	1
RMB011	keeper	Par	24	36	1
RMB011	keeper	Par	24	36	1
RMB011	keeper	Par	24	36	1
RMB011	keeper	Par	24	36	1
RMB011	keeper	Par	24	36	1
RMB011	keeper	Par	24	36	1
RMB011	keeper	Par	60	72	1
RMB011	keeper	Par	60	72	1
RMB011	keeper	Ctl	0	12	1
RMB011	keeper	Ctl	12	24	1
RMB011	keeper	Ctl	96	96	0
RMB011	keeper	Ctl	96	96	0
RMB011	keeper	Ctl	96	96	0
RMB011	keeper	Ctl	96	96	0
RMB011	keeper	Ctl	96	96	0
RMB011	keeper	Ctl	96	96	0
RMB011	keeper	Ctl	96	96	0
RMB011	keeper	Ctl	96	96	0
RFN041	Feral	Par	0	12	1
RFN041	Feral	Par	12	24	1
RFN041	Feral	Par	12	24	1
RFN041	Feral	Par	12	24	1
RFN041	Feral	Par	12	24	1
RFN041	Feral	Par	12	24	1
RFN041	Feral	Par	12	24	1
RFN041	Feral	Par	24	36	1
RFN041	Feral	Par	24	36	1
RFN041	Feral	Par	24	36	1
RFN041	Feral	Par	24	36	1
RFN041	Feral	Par	24	36	1
RFN041	Feral	Par	24	36	1
RFN041	Feral	Par	36	48	1
RFN041	Feral	Par	36	48	1
RFN041	Feral	Par	48	60	1
RFN041	Feral	Par	48	60	1
RFN041	Feral	Par	60	72	1
RFN041	Feral	Par	60	72	1
RFN041	Feral	Par	84	96	1
RFN041	Feral	Par	96	96	0
RFN041	Feral	Ctl	0	12	1
RFN041	Feral	Ctl	0	12	1
RFN041	Feral	Ctl	96	96	0
RFN041	Feral	Ctl	96	96	0
RFN041	Feral	Ctl	96	96	0
RFN041	Feral	Ctl	96	96	0
RFN041	Feral	Ctl	96	96	0
RFN041	Feral	Ctl	96	96	0
RFN041	Feral	Ctl	96	96	0
RFN041	Feral	Ctl	96	96	0
RFN041	Feral	Ctl	96	96	0
RFN041	Feral	Ctl	96	96	0
RFN071	Feral	Par	0	12	1
RFN071	Feral	Par	12	24	1
RFN071	Feral	Par	12	24	1
RFN071	Feral	Par	24	36	1
RFN071	Feral	Par	36	48	1
RFN071	Feral	Par	36	48	1
RFN071	Feral	Par	36	48	1
RFN071	Feral	Par	36	48	1
RFN071	Feral	Par	48	60	1
RFN071	Feral	Par	48	60	1
RFN071	Feral	Par	60	72	1
RFN071	Feral	Par	60	72	1
RFN071	Feral	Par	60	72	1
RFN071	Feral	Par	72	84	1
RFN071	Feral	Par	84	96	1
RFN071	Feral	Par	84	96	1
RFN071	Feral	Par	84	96	1
RFN071	Feral	Par	84	96	1
RFN071	Feral	Par	84	96	1
RFN071	Feral	Par	96	96	0
RFN071	Feral	Par	96	96	0
RFN071	Feral	Par	96	96	0
RFN071	Feral	Par	96	96	0
RFN071	Feral	Par	96	96	0
RFN071	Feral	Par	96	96	0
RFN071	Feral	Ctl	84	96	1
RFN071	Feral	Ctl	96	96	0
RFN071	Feral	Ctl	96	96	0
RFN071	Feral	Ctl	96	96	0
RFN071	Feral	Ctl	96	96	0
RFN071	Feral	Ctl	96	96	0
RFN071	Feral	Ctl	96	96	0
RFN071	Feral	Ctl	96	96	0
RFN071	Feral	Ctl	96	96	0
RFN071	Feral	Ctl	96	96	0
RFN071	Feral	Ctl	96	96	0
RFN071	Feral	Ctl	96	96	0
RFN071	Feral	Ctl	96	96	0
RFN061	Feral	Par	0	12	1
RFN061	Feral	Par	0	12	1
RFN061	Feral	Par	0	12	1
RFN061	Feral	Par	12	24	1
RFN061	Feral	Par	12	24	1
RFN061	Feral	Par	12	24	1
RFN061	Feral	Par	12	24	1
RFN061	Feral	Par	12	24	1
RFN061	Feral	Par	12	24	1
RFN061	Feral	Par	12	24	1
RFN061	Feral	Par	12	24	1
RFN061	Feral	Par	24	36	1
RFN061	Feral	Par	24	36	1
RFN061	Feral	Par	36	48	1
RFN061	Feral	Par	48	60	1
RFN061	Feral	Par	48	60	1
RFN061	Feral	Par	60	84	0
RFN061	Feral	Par	60	84	0
RFN061	Feral	Par	60	84	0
RFN061	Feral	Par	60	84	0
RFN061	Feral	Par	84	96	1
RFN061	Feral	Par	84	96	1
RFN061	Feral	Ctl	12	24	1
RFN061	Feral	Ctl	96	96	0
RFN061	Feral	Ctl	96	96	0
RFN061	Feral	Ctl	96	96	0
RFN061	Feral	Ctl	96	96	0
RFN061	Feral	Ctl	96	96	0
RFN061	Feral	Ctl	96	96	0
RFN061	Feral	Ctl	96	96	0
RFN061	Feral	Ctl	96	96	0
RFN061	Feral	Ctl	96	96	0
RFN061	Feral	Ctl	96	96	0
RFN051	Feral	Par	0	12	1
RFN051	Feral	Par	0	12	1
RFN051	Feral	Par	0	12	1
RFN051	Feral	Par	0	12	1
RFN051	Feral	Par	0	12	1
RFN051	Feral	Par	0	12	1
RFN051	Feral	Par	0	12	1
RFN051	Feral	Par	0	12	1
RFN051	Feral	Par	12	24	1
RFN051	Feral	Par	12	24	1
RFN051	Feral	Par	12	24	1
RFN051	Feral	Par	12	24	1
RFN051	Feral	Par	36	48	1
RFN051	Feral	Par	36	48	1
RFN051	Feral	Par	36	48	1
RFN051	Feral	Par	36	48	1
RFN051	Feral	Par	36	48	1
RFN051	Feral	Par	72	84	1
RFN051	Feral	Ctl	0	12	1
RFN051	Feral	Ctl	0	12	1
RFN051	Feral	Ctl	0	12	1
RFN051	Feral	Ctl	0	12	1
RFN051	Feral	Ctl	0	12	1
RFN051	Feral	Ctl	84	96	1
RFN051	Feral	Ctl	96	96	0
RFN051	Feral	Ctl	96	96	0
RFN051	Feral	Ctl	96	96	0
UFN021	Feral	Par	0	12	1
UFN021	Feral	Par	0	12	1
UFN021	Feral	Par	0	12	1
UFN021	Feral	Par	0	12	1
UFN021	Feral	Par	24	36	1
UFN021	Feral	Par	24	36	1
UFN021	Feral	Par	24	36	1
UFN021	Feral	Par	24	36	1
UFN021	Feral	Par	24	36	1
UFN021	Feral	Par	36	48	1
UFN021	Feral	Par	36	48	1
UFN021	Feral	Par	36	48	1
UFN021	Feral	Par	36	48	1
UFN021	Feral	Par	48	60	1
UFN021	Feral	Par	48	60	1
UFN021	Feral	Par	48	60	1
UFN021	Feral	Par	48	60	1
UFN021	Feral	Par	48	60	1
UFN021	Feral	Par	48	60	1
UFN021	Feral	Par	60	72	1
UFN021	Feral	Par	60	72	1
UFN021	Feral	Par	60	72	1
UFN021	Feral	Par	60	72	1
UFN021	Feral	Par	96	96	0
UFN021	Feral	Par	96	96	0
UFN021	Feral	Ctl	0	12	1
UFN021	Feral	Ctl	72	84	1
UFN021	Feral	Ctl	96	96	0
UFN021	Feral	Ctl	96	96	0
UFN021	Feral	Ctl	96	96	0
UFN021	Feral	Ctl	96	96	0
UFN021	Feral	Ctl	96	96	0
UFN021	Feral	Ctl	96	96	0
UFN021	Feral	Ctl	96	96	0
UFN021	Feral	Ctl	96	96	0
UFN021	Feral	Ctl	96	96	0
UFN021	Feral	Ctl	96	96	0
UFN021	Feral	Ctl	96	96	0
SMB061	keeper	Par	0	12	1
SMB061	keeper	Par	0	12	1
SMB061	keeper	Par	12	24	1
SMB061	keeper	Par	12	24	1
SMB061	keeper	Par	12	24	1
SMB061	keeper	Par	24	36	1
SMB061	keeper	Par	24	36	1
SMB061	keeper	Par	24	36	1
SMB061	keeper	Par	24	36	1
SMB061	keeper	Par	24	36	1
SMB061	keeper	Par	24	36	1
SMB061	keeper	Par	36	48	1
SMB061	keeper	Par	36	48	1
SMB061	keeper	Par	36	48	1
SMB061	keeper	Par	36	48	1
SMB061	keeper	Par	48	60	1
SMB061	keeper	Par	48	60	1
SMB061	keeper	Par	48	60	1
SMB061	keeper	Par	60	72	1
SMB061	keeper	Ctl	12	24	1
SMB061	keeper	Ctl	96	96	0
SMB061	keeper	Ctl	96	96	0
SMB061	keeper	Ctl	96	96	0
SMB061	keeper	Ctl	96	96	0
SMB061	keeper	Ctl	96	96	0
SMB061	keeper	Ctl	96	96	0
SMB061	keeper	Ctl	96	96	0
SMB061	keeper	Ctl	96	96	0
SMB071	keeper	Par	0	12	1
SMB071	keeper	Par	0	12	1
SMB071	keeper	Par	0	12	1
SMB071	keeper	Par	0	12	1
SMB071	keeper	Par	0	12	1
SMB071	keeper	Par	12	24	1
SMB071	keeper	Par	12	24	1
SMB071	keeper	Par	12	24	1
SMB071	keeper	Par	12	24	1
SMB071	keeper	Par	24	36	1
SMB071	keeper	Par	24	36	1
SMB071	keeper	Par	24	36	1
SMB071	keeper	Par	24	36	1
SMB071	keeper	Par	24	36	1
SMB071	keeper	Par	36	48	1
SMB071	keeper	Par	36	48	1
SMB071	keeper	Par	48	60	1
SMB071	keeper	Par	48	60	1
SMB071	keeper	Par	48	60	1
SMB071	keeper	Par	60	72	1
SMB071	keeper	Par	72	84	1
SMB071	keeper	Par	84	96	1
SMB071	keeper	Par	96	96	0
SMB071	keeper	Ctl	0	12	1
SMB071	keeper	Ctl	0	12	1
SMB071	keeper	Ctl	24	36	1
SMB071	keeper	Ctl	72	84	1
SMB071	keeper	Ctl	96	96	0
SMB071	keeper	Ctl	96	96	0
SMB071	keeper	Ctl	96	96	0
SMB071	keeper	Ctl	96	96	0
SMB071	keeper	Ctl	96	96	0
SMB071	keeper	Ctl	96	96	0
SMB071	keeper	Ctl	96	96	0
SMB071	keeper	Ctl	96	96	0
SFN011	Feral	Par	0	12	1
SFN011	Feral	Par	12	24	1
SFN011	Feral	Par	12	24	1
SFN011	Feral	Par	12	24	1
SFN011	Feral	Par	12	24	1
SFN011	Feral	Par	12	24	1
SFN011	Feral	Par	12	24	1
SFN011	Feral	Par	12	24	1
SFN011	Feral	Par	12	24	1
SFN011	Feral	Par	12	24	1
SFN011	Feral	Par	12	24	1
SFN011	Feral	Par	24	36	1
SFN011	Feral	Par	24	36	1
SFN011	Feral	Par	24	36	1
SFN011	Feral	Par	24	36	1
SFN011	Feral	Par	24	36	1
SFN011	Feral	Par	36	48	1
SFN011	Feral	Par	36	48	1
SFN011	Feral	Par	36	48	1
SFN011	Feral	Par	36	48	1
SFN011	Feral	Par	48	60	1
SFN011	Feral	Par	48	60	1
SFN011	Feral	Par	48	60	1
SFN011	Feral	Par	96	96	0
SFN011	Feral	Ctl	0	12	1
SFN011	Feral	Ctl	96	96	0
SFN011	Feral	Ctl	96	96	0
SFN011	Feral	Ctl	96	96	0
SFN011	Feral	Ctl	96	96	0
SFN011	Feral	Ctl	96	96	0
SFN011	Feral	Ctl	96	96	0
SFN011	Feral	Ctl	96	96	0
SFN011	Feral	Ctl	96	96	0
SFN011	Feral	Ctl	96	96	0
SFN011	Feral	Ctl	96	96	0
SFN011	Feral	Ctl	96	96	0
RFN011	Feral	Par	0	12	1
RFN011	Feral	Par	0	12	1
RFN011	Feral	Par	0	12	1
RFN011	Feral	Par	0	12	1
RFN011	Feral	Par	0	12	1
RFN011	Feral	Par	12	24	1
RFN011	Feral	Par	12	24	1
RFN011	Feral	Par	12	24	1
RFN011	Feral	Par	12	24	1
RFN011	Feral	Par	24	36	1
RFN011	Feral	Par	24	36	1
RFN011	Feral	Par	24	36	1
RFN011	Feral	Par	24	36	1
RFN011	Feral	Par	24	36	1
RFN011	Feral	Par	24	36	1
RFN011	Feral	Par	36	48	1
RFN011	Feral	Par	36	48	1
RFN011	Feral	Par	36	48	1
RFN011	Feral	Par	36	48	1
RFN011	Feral	Par	60	72	1
RFN011	Feral	Par	72	84	1
RFN011	Feral	Par	84	96	1
RFN011	Feral	Ctl	12	24	1
RFN011	Feral	Ctl	96	96	0
RFN011	Feral	Ctl	96	96	0
RFN011	Feral	Ctl	96	96	0
RFN011	Feral	Ctl	96	96	0
RFN011	Feral	Ctl	96	96	0
RFN011	Feral	Ctl	96	96	0
RFN011	Feral	Ctl	96	96	0
RFN011	Feral	Ctl	96	96	0
RFN011	Feral	Ctl	96	96	0
RFN011	Feral	Ctl	96	96	0
RFN021	Feral	Par	0	36	0
RFN021	Feral	Par	0	36	0
RFN021	Feral	Par	0	36	0
RFN021	Feral	Par	0	36	0
RFN021	Feral	Par	0	36	0
RFN021	Feral	Par	0	36	0
RFN021	Feral	Par	0	36	0
RFN021	Feral	Par	0	36	0
RFN021	Feral	Par	0	36	0
RFN021	Feral	Par	36	48	1
RFN021	Feral	Par	36	48	1
RFN021	Feral	Par	36	48	1
RFN021	Feral	Par	36	48	1
RFN021	Feral	Par	48	60	1
RFN021	Feral	Par	48	60	1
RFN021	Feral	Par	48	60	1
RFN021	Feral	Par	48	60	1
RFN021	Feral	Par	60	72	1
RFN021	Feral	Par	72	84	1
RFN021	Feral	Par	72	84	1
RFN021	Feral	Par	84	96	1
RFN021	Feral	Par	84	96	1
RFN021	Feral	Ctl	96	96	0
RFN021	Feral	Ctl	96	96	0
RFN021	Feral	Ctl	96	96	0
RFN021	Feral	Ctl	96	96	0
RFN021	Feral	Ctl	96	96	0
RFN021	Feral	Ctl	96	96	0
RFN021	Feral	Ctl	96	96	0
RFN021	Feral	Ctl	96	96	0
RFN021	Feral	Ctl	96	96	0
RFN021	Feral	Ctl	96	96	0
UMB031	keeper	Par	0	12	1
UMB031	keeper	Par	0	12	1
UMB031	keeper	Par	0	12	1
UMB031	keeper	Par	0	12	1
UMB031	keeper	Par	0	12	1
UMB031	keeper	Par	12	24	1
UMB031	keeper	Par	12	24	1
UMB031	keeper	Par	12	24	1
UMB031	keeper	Par	24	36	1
UMB031	keeper	Par	24	36	1
UMB031	keeper	Par	24	36	1
UMB031	keeper	Par	36	48	1
UMB031	keeper	Par	48	60	1
UMB031	keeper	Par	48	60	1
UMB031	keeper	Par	48	60	1
UMB031	keeper	Par	48	60	1
UMB031	keeper	Par	48	60	1
UMB031	keeper	Par	60	72	1
UMB031	keeper	Par	84	96	1
UMB031	keeper	Par	84	96	1
UMB031	keeper	Par	96	96	0
UMB031	keeper	Par	96	96	0
UMB031	keeper	Par	96	96	0
UMB031	keeper	Ctl	0	12	1
UMB031	keeper	Ctl	0	12	1
UMB031	keeper	Ctl	96	96	0
UMB031	keeper	Ctl	96	96	0
UMB031	keeper	Ctl	96	96	0
UMB031	keeper	Ctl	96	96	0
UMB031	keeper	Ctl	96	96	0
UMB031	keeper	Ctl	96	96	0
UMB031	keeper	Ctl	96	96	0
UMB031	keeper	Ctl	96	96	0
UMB021	keeper	Par	0	12	1
UMB021	keeper	Par	0	12	1
UMB021	keeper	Par	0	12	1
UMB021	keeper	Par	0	12	1
UMB021	keeper	Par	0	12	1
UMB021	keeper	Par	0	12	1
UMB021	keeper	Par	0	12	1
UMB021	keeper	Par	0	12	1
UMB021	keeper	Par	0	12	1
UMB021	keeper	Par	0	12	1
UMB021	keeper	Par	12	24	1
UMB021	keeper	Par	24	36	1
UMB021	keeper	Par	24	36	1
UMB021	keeper	Par	24	36	1
UMB021	keeper	Par	36	48	1
UMB021	keeper	Par	36	48	1
UMB021	keeper	Par	36	48	1
UMB021	keeper	Par	48	60	1
UMB021	keeper	Par	48	60	1
UMB021	keeper	Par	48	60	1
UMB021	keeper	Par	48	60	1
UMB021	keeper	Par	48	60	1
UMB021	keeper	Par	48	60	1
UMB021	keeper	Par	60	72	1
UMB021	keeper	Par	60	72	1
UMB021	keeper	Ctl	0	12	1
UMB021	keeper	Ctl	0	12	1
UMB021	keeper	Ctl	0	12	1
UMB021	keeper	Ctl	84	96	1
UMB021	keeper	Ctl	96	96	0
UMB021	keeper	Ctl	96	96	0
UMB021	keeper	Ctl	96	96	0
UMB021	keeper	Ctl	96	96	0
UMB021	keeper	Ctl	96	96	0
UMB021	keeper	Ctl	96	96	0
UMB021	keeper	Ctl	96	96	0
UMB021	keeper	Ctl	96	96	0
SMB012	keeper	Par	0	12	1
SMB012	keeper	Par	0	12	1
SMB012	keeper	Par	0	12	1
SMB012	keeper	Par	0	12	1
SMB012	keeper	Par	0	12	1
SMB012	keeper	Par	0	12	1
SMB012	keeper	Par	0	12	1
SMB012	keeper	Par	0	12	1
SMB012	keeper	Par	0	12	1
SMB012	keeper	Par	0	12	1
SMB012	keeper	Par	0	12	1
SMB012	keeper	Par	0	12	1
SMB012	keeper	Par	12	24	1
SMB012	keeper	Par	12	24	1
SMB012	keeper	Par	12	24	1
SMB012	keeper	Par	12	24	1
SMB012	keeper	Par	12	24	1
SMB012	keeper	Par	24	36	1
SMB012	keeper	Par	24	36	1
SMB012	keeper	Par	24	36	1
SMB012	keeper	Par	48	60	1
SMB012	keeper	Par	60	72	1
SMB012	keeper	Par	72	84	1
SMB012	keeper	Ctl	0	12	1
SMB012	keeper	Ctl	0	12	1
SMB012	keeper	Ctl	0	12	1
SMB012	keeper	Ctl	0	12	1
SMB012	keeper	Ctl	0	12	1
SMB012	keeper	Ctl	96	96	0
SMB012	keeper	Ctl	96	96	0
SMB012	keeper	Ctl	96	96	0
SMB012	keeper	Ctl	96	96	0
SMB012	keeper	Ctl	96	96	0
UMB011	keeper	Par	0	12	1
UMB011	keeper	Par	0	12	1
UMB011	keeper	Par	0	12	1
UMB011	keeper	Par	0	12	1
UMB011	keeper	Par	0	12	1
UMB011	keeper	Par	0	12	1
UMB011	keeper	Par	0	12	1
UMB011	keeper	Par	0	12	1
UMB011	keeper	Par	12	24	1
UMB011	keeper	Par	12	24	1
UMB011	keeper	Par	12	24	1
UMB011	keeper	Par	24	36	1
UMB011	keeper	Par	36	48	1
UMB011	keeper	Par	48	60	1
UMB011	keeper	Par	48	60	1
UMB011	keeper	Par	84	96	1
UMB011	keeper	Par	96	96	0
UMB011	keeper	Par	96	96	0
UMB011	keeper	Par	96	96	0
UMB011	keeper	Ctl	0	12	1
UMB011	keeper	Ctl	12	24	1
UMB011	keeper	Ctl	12	24	1
UMB011	keeper	Ctl	24	36	1
UMB011	keeper	Ctl	48	60	1
UMB011	keeper	Ctl	48	60	1
UMB011	keeper	Ctl	60	84	0
UMB011	keeper	Ctl	96	96	0
UMB011	keeper	Ctl	96	96	0
SMB041	keeper	Par	0	12	1
SMB041	keeper	Par	0	12	1
SMB041	keeper	Par	0	12	1
SMB041	keeper	Par	0	12	1
SMB041	keeper	Par	0	12	1
SMB041	keeper	Par	0	12	1
SMB041	keeper	Par	0	12	1
SMB041	keeper	Par	0	12	1
SMB041	keeper	Par	0	12	1
SMB041	keeper	Par	0	12	1
SMB041	keeper	Par	12	24	1
SMB041	keeper	Par	12	24	1
SMB041	keeper	Par	12	24	1
SMB041	keeper	Par	12	24	1
SMB041	keeper	Par	24	36	1
SMB041	keeper	Par	24	36	1
SMB041	keeper	Par	24	36	1
SMB041	keeper	Par	24	36	1
SMB041	keeper	Par	48	60	1
SMB041	keeper	Par	48	60	1
SMB041	keeper	Ctl	0	12	1
SMB041	keeper	Ctl	0	12	1
SMB041	keeper	Ctl	0	12	1
SMB041	keeper	Ctl	0	12	1
SMB041	keeper	Ctl	72	84	1
SMB041	keeper	Ctl	96	96	0
SMB041	keeper	Ctl	96	96	0
SMB041	keeper	Ctl	96	96	0
SMB041	keeper	Ctl	96	96	0
SMB041	keeper	Ctl	96	96	0
SMB051	keeper	Par	0	12	1
SMB051	keeper	Par	0	12	1
SMB051	keeper	Par	0	12	1
SMB051	keeper	Par	0	12	1
SMB051	keeper	Par	0	12	1
SMB051	keeper	Par	0	12	1
SMB051	keeper	Par	0	12	1
SMB051	keeper	Par	0	12	1
SMB051	keeper	Par	0	12	1
SMB051	keeper	Par	0	12	1
SMB051	keeper	Par	0	12	1
SMB051	keeper	Par	12	24	1
SMB051	keeper	Par	12	24	1
SMB051	keeper	Par	12	24	1
SMB051	keeper	Par	12	24	1
SMB051	keeper	Par	12	24	1
SMB051	keeper	Par	24	36	1
SMB051	keeper	Par	24	36	1
SMB051	keeper	Par	24	36	1
SMB051	keeper	Par	24	36	1
SMB051	keeper	Par	36	48	1
SMB051	keeper	Par	36	48	1
SMB051	keeper	Par	36	48	1
SMB051	keeper	Par	36	48	1
SMB051	keeper	Par	36	48	1
SMB051	keeper	Par	48	60	1
SMB051	keeper	Par	48	60	1
SMB051	keeper	Par	60	72	1
SMB051	keeper	Ctl	0	12	1
SMB051	keeper	Ctl	0	12	1
SMB051	keeper	Ctl	0	12	1
SMB051	keeper	Ctl	36	48	1
SMB051	keeper	Ctl	36	48	1
SMB051	keeper	Ctl	36	48	1
SMB051	keeper	Ctl	36	48	1
SMB051	keeper	Ctl	48	60	1
SMB051	keeper	Ctl	48	60	1
SMB051	keeper	Ctl	96	96	0
SMB051	keeper	Ctl	96	96	0
SMB051	keeper	Ctl	96	96	0
SMB051	keeper	Ctl	96	96	0
SMB051	keeper	Ctl	96	96	0
SFN021	Feral	Par	0	12	1
SFN021	Feral	Par	12	24	1
SFN021	Feral	Par	12	24	1
SFN021	Feral	Par	12	24	1
SFN021	Feral	Par	24	36	1
SFN021	Feral	Par	24	36	1
SFN021	Feral	Par	36	48	1
SFN021	Feral	Par	36	48	1
SFN021	Feral	Par	36	48	1
SFN021	Feral	Par	36	48	1
SFN021	Feral	Par	36	48	1
SFN021	Feral	Par	36	48	1
SFN021	Feral	Par	48	60	1
SFN021	Feral	Par	48	60	1
SFN021	Feral	Par	60	72	1
SFN021	Feral	Par	60	72	1
SFN021	Feral	Par	60	72	1
SFN021	Feral	Par	72	84	1
SFN021	Feral	Par	84	96	1
SFN021	Feral	Par	84	96	1
SFN021	Feral	Par	96	96	0
SFN021	Feral	Par	96	96	0
SFN021	Feral	Ctl	12	24	1
SFN021	Feral	Ctl	96	96	0
SFN021	Feral	Ctl	96	96	0
SFN021	Feral	Ctl	96	96	0
SFN021	Feral	Ctl	96	96	0
SFN021	Feral	Ctl	96	96	0
SFN021	Feral	Ctl	96	96	0
SFN021	Feral	Ctl	96	96	0
SFN021	Feral	Ctl	96	96	0
SFN021	Feral	Ctl	96	96	0
SMB021	keeper	Ctl	96	96	0
SMB031	keeper	Par	0	12	1
SMB031	keeper	Par	0	12	1
SMB031	keeper	Par	12	24	1
SMB031	keeper	Par	12	24	1
SMB031	keeper	Par	12	24	1
SMB031	keeper	Par	24	36	1
SMB031	keeper	Par	24	36	1
SMB031	keeper	Par	24	36	1
SMB031	keeper	Par	24	36	1
SMB031	keeper	Par	24	36	1
SMB031	keeper	Par	24	36	1
SMB031	keeper	Par	24	36	1
SMB031	keeper	Par	48	60	1
SMB031	keeper	Par	60	72	1
SMB031	keeper	Par	60	72	1
SMB031	keeper	Par	60	72	1
SMB031	keeper	Par	60	72	1
SMB031	keeper	Par	60	72	1
SMB031	keeper	Par	96	96	0
SMB031	keeper	Par	96	96	0
SMB031	keeper	Ctl	0	12	1
SMB031	keeper	Ctl	12	24	1
SMB031	keeper	Ctl	12	24	1
SMB031	keeper	Ctl	48	60	1
SMB031	keeper	Ctl	96	96	0
SMB031	keeper	Ctl	96	96	0
SMB031	keeper	Ctl	96	96	0
SMB031	keeper	Ctl	96	96	0
SMB031	keeper	Ctl	96	96	0
SMB031	keeper	Ctl	96	96	0
SMB031	keeper	Ctl	96	96	0
SMB021	keeper	Par	0	12	1
SMB021	keeper	Par	0	12	1
SMB021	keeper	Par	0	12	1
SMB021	keeper	Par	0	12	1
SMB021	keeper	Par	0	12	1
SMB021	keeper	Par	12	24	1
SMB021	keeper	Par	12	24	1
SMB021	keeper	Par	12	24	1
SMB021	keeper	Par	12	24	1
SMB021	keeper	Par	12	24	1
SMB021	keeper	Par	12	24	1
SMB021	keeper	Par	24	36	1
SMB021	keeper	Par	24	36	1
SMB021	keeper	Par	36	48	1
SMB021	keeper	Par	36	48	1
SMB021	keeper	Par	48	60	1
SMB021	keeper	Par	48	60	1
SMB021	keeper	Par	48	60	1
SMB021	keeper	Par	48	60	1
SMB021	keeper	Par	72	84	1
SMB021	keeper	Par	72	84	1
SMB021	keeper	Par	84	96	1
SMB021	keeper	Ctl	0	12	1
SMB021	keeper	Ctl	0	12	1
SMB021	keeper	Ctl	24	36	1
SMB021	keeper	Ctl	36	48	1
SMB021	keeper	Ctl	96	96	0
SMB021	keeper	Ctl	96	96	0
SMB021	keeper	Ctl	96	96	0
SMB021	keeper	Ctl	96	96	0
SMB021	keeper	Ctl	96	96	0
SMB021	keeper	Ctl	96	96	0
UMB061	keeper	Par	0	12	1
UMB061	keeper	Par	12	24	1
UMB061	keeper	Par	12	24	1
UMB061	keeper	Par	12	24	1
UMB061	keeper	Par	12	24	1
UMB061	keeper	Par	12	24	1
UMB061	keeper	Par	24	36	1
UMB061	keeper	Par	24	36	1
UMB061	keeper	Par	36	48	1
UMB061	keeper	Par	36	48	1
UMB061	keeper	Par	48	60	1
UMB061	keeper	Par	60	72	1
UMB061	keeper	Par	60	72	1
UMB061	keeper	Par	72	84	1
UMB061	keeper	Par	72	84	1
UMB061	keeper	Par	96	96	0
UMB061	keeper	Par	96	96	0
UMB061	keeper	Par	96	96	0
UMB061	keeper	Ctl	0	12	1
UMB061	keeper	Ctl	84	96	1
UMB061	keeper	Ctl	96	96	0
UMB061	keeper	Ctl	96	96	0
UMB061	keeper	Ctl	96	96	0
UMB061	keeper	Ctl	96	96	0
UMB061	keeper	Ctl	96	96	0
UMB061	keeper	Ctl	96	96	0
UMB061	keeper	Ctl	96	96	0
UMB061	keeper	Ctl	96	96	0
UMB061	keeper	Ctl	96	96	0
UMB061	keeper	Ctl	96	96	0
UMB071	keeper	Par	0	12	1
UMB071	keeper	Par	0	12	1
UMB071	keeper	Par	12	24	1
UMB071	keeper	Par	12	24	1
UMB071	keeper	Par	12	24	1
UMB071	keeper	Par	24	36	1
UMB071	keeper	Par	24	36	1
UMB071	keeper	Par	24	36	1
UMB071	keeper	Par	24	36	1
UMB071	keeper	Par	24	36	1
UMB071	keeper	Par	24	36	1
UMB071	keeper	Par	36	48	1
UMB071	keeper	Par	36	48	1
UMB071	keeper	Par	36	48	1
UMB071	keeper	Par	36	48	1
UMB071	keeper	Par	36	48	1
UMB071	keeper	Par	36	48	1
UMB071	keeper	Par	36	48	1
UMB071	keeper	Par	48	60	1
UMB071	keeper	Par	60	72	1
UMB071	keeper	Par	60	72	1
UMB071	keeper	Par	60	72	1
UMB071	keeper	Par	96	96	0
UMB071	keeper	Ctl	0	12	1
UMB071	keeper	Ctl	0	12	1
UMB071	keeper	Ctl	12	24	1
UMB071	keeper	Ctl	96	96	0
UMB071	keeper	Ctl	96	96	0
UMB071	keeper	Ctl	96	96	0
UMB071	keeper	Ctl	96	96	0
UMB071	keeper	Ctl	96	96	0
UMB071	keeper	Ctl	96	96	0
UMB071	keeper	Ctl	96	96	0
UMB071	keeper	Ctl	96	96	0
UMB041	keeper	Par	0	12	1
UMB041	keeper	Par	12	24	1
UMB041	keeper	Par	12	24	1
UMB041	keeper	Par	24	36	1
UMB041	keeper	Par	24	36	1
UMB041	keeper	Par	24	36	1
UMB041	keeper	Par	24	36	1
UMB041	keeper	Par	36	48	1
UMB041	keeper	Par	36	48	1
UMB041	keeper	Par	36	48	1
UMB041	keeper	Par	36	48	1
UMB041	keeper	Par	36	48	1
UMB041	keeper	Par	36	48	1
UMB041	keeper	Par	48	60	1
UMB041	keeper	Par	48	60	1
UMB041	keeper	Par	48	60	1
UMB041	keeper	Par	48	60	1
UMB041	keeper	Par	48	60	1
UMB041	keeper	Par	60	72	1
UMB041	keeper	Par	72	84	1
UMB041	keeper	Par	96	96	0
UMB041	keeper	Par	96	96	0
UMB041	keeper	Par	96	96	0
UMB041	keeper	Par	96	96	0
UMB041	keeper	Ctl	96	96	0
UMB041	keeper	Ctl	96	96	0
UMB041	keeper	Ctl	96	96	0
UMB041	keeper	Ctl	96	96	0
UMB041	keeper	Ctl	96	96	0
UMB041	keeper	Ctl	96	96	0
UMB041	keeper	Ctl	96	96	0
UMB041	keeper	Ctl	96	96	0
UMB041	keeper	Ctl	96	96	0
UMB041	keeper	Ctl	96	96	0
UMB041	keeper	Ctl	96	96	0
UMB041	keeper	Ctl	96	96	0
UMB051	keeper	Par	0	12	1
UMB051	keeper	Par	0	12	1
UMB051	keeper	Par	0	12	1
UMB051	keeper	Par	12	24	1
UMB051	keeper	Par	12	24	1
UMB051	keeper	Par	12	24	1
UMB051	keeper	Par	12	24	1
UMB051	keeper	Par	24	36	1
UMB051	keeper	Par	24	36	1
UMB051	keeper	Par	24	36	1
UMB051	keeper	Par	24	36	1
UMB051	keeper	Par	24	36	1
UMB051	keeper	Par	24	36	1
UMB051	keeper	Par	24	36	1
UMB051	keeper	Par	36	48	1
UMB051	keeper	Par	36	48	1
UMB051	keeper	Par	36	48	1
UMB051	keeper	Par	36	48	1
UMB051	keeper	Par	36	48	1
UMB051	keeper	Par	36	48	1
UMB051	keeper	Par	48	60	1
UMB051	keeper	Par	48	60	1
UMB051	keeper	Par	48	60	1
UMB051	keeper	Par	60	72	1
UMB051	keeper	Ctl	0	12	1
UMB051	keeper	Ctl	0	12	1
UMB051	keeper	Ctl	36	48	1
UMB051	keeper	Ctl	60	72	1
UMB051	keeper	Ctl	60	72	1
UMB051	keeper	Ctl	96	96	0
UMB051	keeper	Ctl	96	96	0
UMB051	keeper	Ctl	96	96	0
UMB051	keeper	Ctl	96	96	0
UMB051	keeper	Ctl	96	96	0
UMB051	keeper	Ctl	96	96	0
UMB051	keeper	Ctl	96	96	0
UFN031	Feral	Par	0	12	1
UFN031	Feral	Par	0	12	1
UFN031	Feral	Par	0	12	1
UFN031	Feral	Par	0	12	1
UFN031	Feral	Par	12	24	1
UFN031	Feral	Par	12	24	1
UFN031	Feral	Par	12	24	1
UFN031	Feral	Par	12	24	1
UFN031	Feral	Par	12	24	1
UFN031	Feral	Par	12	24	1
UFN031	Feral	Par	12	24	1
UFN031	Feral	Par	12	24	1
UFN031	Feral	Par	24	36	1
UFN031	Feral	Par	24	36	1
UFN031	Feral	Par	24	36	1
UFN031	Feral	Par	24	36	1
UFN031	Feral	Par	36	48	1
UFN031	Feral	Par	36	48	1
UFN031	Feral	Par	48	60	1
UFN031	Feral	Par	48	60	1
UFN031	Feral	Par	60	72	1
UFN031	Feral	Par	72	84	1
UFN031	Feral	Par	84	96	1
UFN031	Feral	Ctl	0	12	1
UFN031	Feral	Ctl	0	12	1
UFN031	Feral	Ctl	12	24	1
UFN031	Feral	Ctl	24	36	1
UFN031	Feral	Ctl	84	96	1
UFN031	Feral	Ctl	84	96	1
UFN031	Feral	Ctl	84	96	1
UFN031	Feral	Ctl	96	96	0
UFN031	Feral	Ctl	96	96	0
UFN031	Feral	Ctl	96	96	0
UFN031	Feral	Ctl	96	96	0
UFN031	Feral	Ctl	96	96	0
UMB081	keeper	Par	12	24	1
UMB081	keeper	Par	12	24	1
UMB081	keeper	Par	12	24	1
UMB081	keeper	Par	12	24	1
UMB081	keeper	Par	12	24	1
UMB081	keeper	Par	24	36	1
UMB081	keeper	Par	24	36	1
UMB081	keeper	Par	24	36	1
UMB081	keeper	Par	24	36	1
UMB081	keeper	Par	24	36	1
UMB081	keeper	Par	24	36	1
UMB081	keeper	Par	24	36	1
UMB081	keeper	Par	24	36	1
UMB081	keeper	Par	36	48	1
UMB081	keeper	Par	36	48	1
UMB081	keeper	Par	36	48	1
UMB081	keeper	Par	36	48	1
UMB081	keeper	Par	36	48	1
UMB081	keeper	Par	36	48	1
UMB081	keeper	Par	48	60	1
UMB081	keeper	Par	48	60	1
UMB081	keeper	Par	48	60	1
UMB081	keeper	Par	48	60	1
UMB081	keeper	Par	60	72	1
UMB081	keeper	Par	72	84	1
UMB081	keeper	Par	72	84	1
UMB081	keeper	Par	96	96	0
UMB081	keeper	Par	96	96	0
UMB081	keeper	Ctl	60	72	1
UMB081	keeper	Ctl	96	96	0
UMB081	keeper	Ctl	96	96	0
UMB081	keeper	Ctl	96	96	0
UMB081	keeper	Ctl	96	96	0
UMB081	keeper	Ctl	96	96	0
UMB081	keeper	Ctl	96	96	0
UMB081	keeper	Ctl	96	96	0
UMB081	keeper	Ctl	96	96	0
UMB081	keeper	Ctl	96	96	0
UMB081	keeper	Ctl	96	96	0
UMB081	keeper	Ctl	96	96	0
UMB081	keeper	Ctl	96	96	0
UMB081	keeper	Ctl	96	96	0
UMB091	keeper	Par	12	24	1
UMB091	keeper	Par	12	24	1
UMB091	keeper	Par	12	24	1
UMB091	keeper	Par	12	24	1
UMB091	keeper	Par	24	36	1
UMB091	keeper	Par	24	36	1
UMB091	keeper	Par	24	36	1
UMB091	keeper	Par	24	36	1
UMB091	keeper	Par	24	36	1
UMB091	keeper	Par	24	36	1
UMB091	keeper	Par	24	36	1
UMB091	keeper	Par	24	36	1
UMB091	keeper	Par	24	36	1
UMB091	keeper	Par	24	36	1
UMB091	keeper	Par	36	48	1
UMB091	keeper	Par	36	48	1
UMB091	keeper	Par	36	48	1
UMB091	keeper	Par	48	60	1
UMB091	keeper	Par	60	72	1
UMB091	keeper	Par	60	72	1
UMB091	keeper	Par	72	84	1
UMB091	keeper	Par	96	96	0
UMB091	keeper	Ctl	0	12	1
UMB091	keeper	Ctl	0	12	1
UMB091	keeper	Ctl	0	12	1
UMB091	keeper	Ctl	24	36	1
UMB091	keeper	Ctl	96	96	0
UMB091	keeper	Ctl	96	96	0
UMB091	keeper	Ctl	96	96	0
UMB091	keeper	Ctl	96	96	0
UMB091	keeper	Ctl	96	96	0
UMB091	keeper	Ctl	96	96	0
UMB091	keeper	Ctl	96	96	0
UFN041	Feral	Par	0	12	1
UFN041	Feral	Par	12	24	1
UFN041	Feral	Par	12	24	1
UFN041	Feral	Par	12	24	1
UFN041	Feral	Par	12	24	1
UFN041	Feral	Par	12	24	1
UFN041	Feral	Par	12	24	1
UFN041	Feral	Par	12	24	1
UFN041	Feral	Par	12	24	1
UFN041	Feral	Par	12	24	1
UFN041	Feral	Par	12	24	1
UFN041	Feral	Par	24	36	1
UFN041	Feral	Par	24	36	1
UFN041	Feral	Par	24	36	1
UFN041	Feral	Par	24	36	1
UFN041	Feral	Par	24	36	1
UFN041	Feral	Par	36	48	1
UFN041	Feral	Par	36	48	1
UFN041	Feral	Par	36	48	1
UFN041	Feral	Par	36	48	1
UFN041	Feral	Par	60	72	1
UFN041	Feral	Ctl	0	12	1
UFN041	Feral	Ctl	12	24	1
UFN041	Feral	Ctl	24	36	1
UFN041	Feral	Ctl	24	36	1
UFN041	Feral	Ctl	60	72	1
UFN041	Feral	Ctl	60	72	1
UFN041	Feral	Ctl	84	96	1
UFN041	Feral	Ctl	96	96	0
UFN041	Feral	Ctl	96	96	0
UFN041	Feral	Ctl	96	96	0
UFN011	Feral	Par	0	12	1
UFN011	Feral	Par	0	12	1
UFN011	Feral	Par	0	12	1
UFN011	Feral	Par	0	12	1
UFN011	Feral	Par	0	12	1
UFN011	Feral	Par	0	12	1
UFN011	Feral	Par	0	12	1
UFN011	Feral	Par	0	12	1
UFN011	Feral	Par	12	24	1
UFN011	Feral	Par	12	24	1
UFN011	Feral	Par	24	36	1
UFN011	Feral	Par	24	36	1
UFN011	Feral	Par	24	36	1
UFN011	Feral	Par	36	48	1
UFN011	Feral	Par	48	60	1
UFN011	Feral	Par	48	60	1
UFN011	Feral	Par	48	60	1
UFN011	Feral	Par	48	60	1
UFN011	Feral	Par	60	72	1
UFN011	Feral	Par	72	84	1
UFN011	Feral	Par	84	96	1
UFN011	Feral	Ctl	0	12	1
UFN011	Feral	Ctl	0	12	1
UFN011	Feral	Ctl	0	12	1
UFN011	Feral	Ctl	12	24	1
UFN011	Feral	Ctl	84	96	1
UFN011	Feral	Ctl	96	96	0
UFN011	Feral	Ctl	96	96	0
UFN011	Feral	Ctl	96	96	0
UFN011	Feral	Ctl	96	96	0
UFN011	Feral	Ctl	96	96	0
UFN011	Feral	Ctl	96	96	0
